# Supplementary material
Source: MDPI journal article supplement (https://www.mdpi.com/1999-4907/11/6/707)
Supplement: s1 [file s1]

**Supplementary Materials:** The following are available online at [www.mdpi.com/xxx/s1](http://www.mdpi.com/xxx/s1)

**Table S1.** Statistical values obtained in leaf photosynthesis parameters in *Quercus* spp. (A) and Andalusian *Q. ilex* populations (B) at day 9, and Andalusian *Q. ilex* population (C) at day 21. Asterisk (\*) indicates that the Kruskal–Wallis test was carried out obtaining *F* values.

| A                   |            | A              |            | Gs             |  |
|---------------------|------------|----------------|------------|----------------|--|
|                     | <i>T</i>   | <i>p-Value</i> | <i>T</i>   | <i>p-Value</i> |  |
| <i>Q. faginea</i>   | 5.65       | 0.0048         | 4.20       | 0.0137         |  |
| <i>Q. pyrenaica</i> | 6.39       | 0.0031         | 28.99      | 0.0000         |  |
| <i>Q. robur</i>     | 8.97       | 0.0009         | 12.73      | 0.0002         |  |
| <i>Q. suber</i>     | 11.83      | 0.0003         | 5.54       | 0.0052         |  |
| <i>Q. ilex</i>      | 1.69       | 0.1672         | 3.78       | 0.0194         |  |
| B                   |            | A              |            | Gs             |  |
|                     | <i>T</i>   | <i>p-Value</i> | <i>T</i>   | <i>p-Value</i> |  |
| Ca                  | −0.04      | 0.9732         | 1.22       | 0.2879         |  |
| Co                  | 3.03       | 0.0387         | 4.28       | 0.0129         |  |
| Se                  | −0.99      | 0.3790         | 1.11       | 0.3295         |  |
| Gr                  | 0.27       | 0.8020         | 8.49       | 0.0011         |  |
| Ja                  | 3.29       | 0.0303         | 6.36       | 0.0031         |  |
| C                   |            | A              |            | Gs             |  |
|                     | <i>T</i> * | <i>p-Value</i> | <i>T</i> * | <i>p-Value</i> |  |
| Ca                  | 5.23       | 0.0064         | 7.83       | 0.0014         |  |
| Co                  | 13.5 *     | 0.0213         | 27.00 *    | 0.0065         |  |
| Se                  | 13.5 *     | 0.0213         | 22.00      | 0.0000         |  |
| Gr                  | 9.94       | 0.0006         | 18.00 *    | 0.0132         |  |
| Ja                  | 13.5 *     | 0.0213         | 36.00 *    | 0.0039         |  |

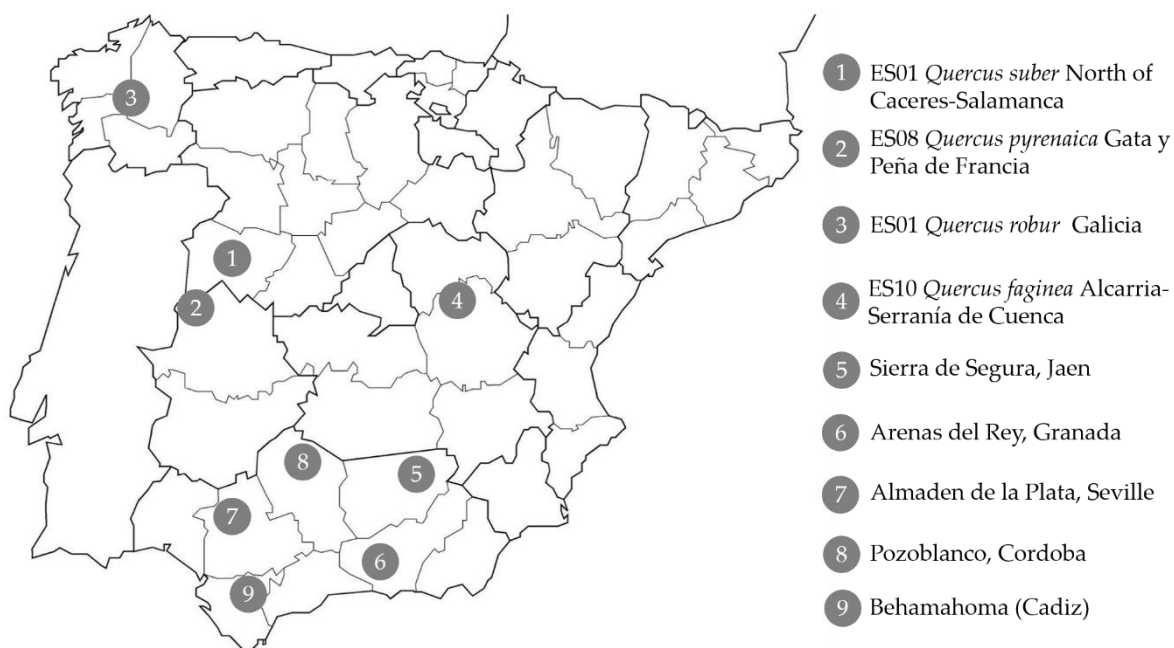

**Figure S1.** Localization of all *Quercus* spp., and Andalusian *Q. ilex* population used in this study.

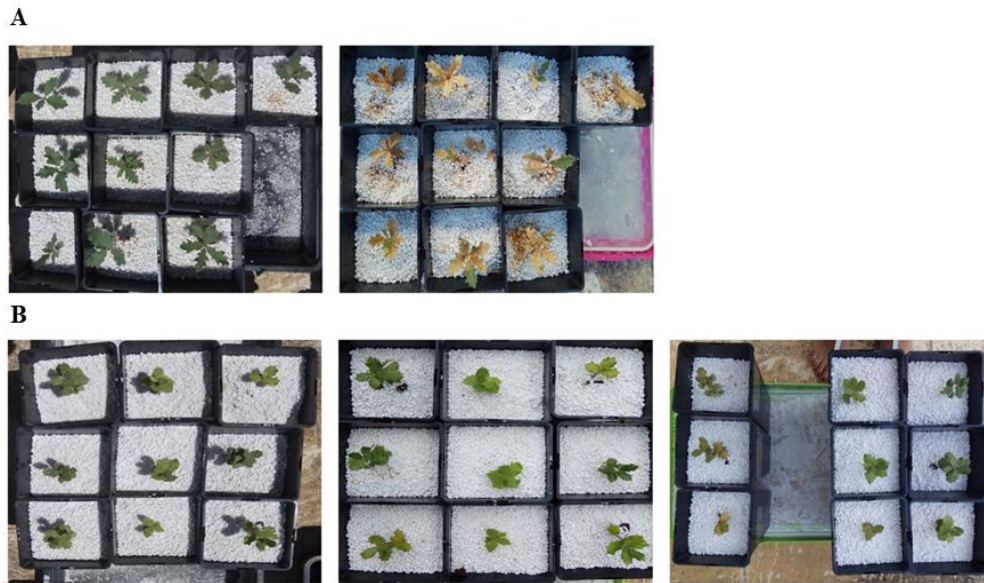

**Figure S2.** Visual evaluation of damage symptoms in the two most contrasting species: *Q. pyrenaica* (A) and *Q. ilex* (B). Pictures were taken at days 1 and 9 in *Q. pyrenaica* and at days 1, 9, and 27 in *Q. ilex*; whereas all the seedlings for *Q. pyrenaica* were dead, no clear damage symptoms were observed in any of the *Q. ilex* seedlings.

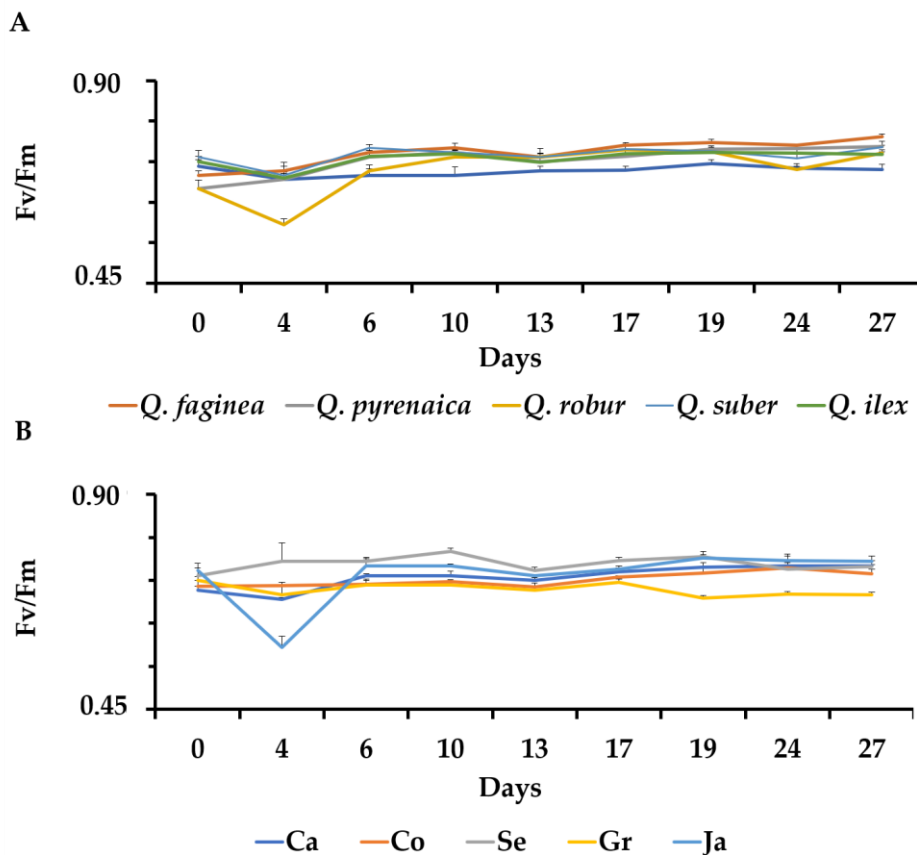

**Figure S3.** Measurements of quantum yield of photosystem II ( $F_v/F_m$ ) in dark adapted leaves from *Quercus* spp., (A) and *Q. ilex* interpopulation species (B) (irrigated seedlings) during drought progression. Values are mean  $\pm$  SE of three biological replicates.
